# Supplementary material
Source: ML conference proceedings conference paper supplement (https://openaccess.thecvf.com/content/ICCV2023/html/Karimian_Essential_Matrix_Estimation_ICCV_2023_paper.html)
Supplement: Supplementary file 1 [file Karimian_Essential_Matrix_Estimation_ICCV_2023_supplemental.pdf]

# Essential Matrix Estimation using Convex Relaxations in Orthogonal Space

## Supplementary Material

Arman Karimian  
Boston University  
armandok@bu.edu

Roberto Tron  
Boston University  
tron@bu.edu

### 1. Extended Quintessential Manifold $\Omega(r)$

#### 1.1. Projection on Tangent Space

**Lemma 1.** *Projection on the tangent space of the Extended Quintessential manifold is given by:*

$$\begin{aligned} \tilde{\mathbf{Z}} &= \mathbf{Z} - \mathbf{V}\text{sym}(\mathbf{V}^\top \mathbf{Z}) \\ \text{Proj}_{\mathbf{V}}(\mathbf{Z}) &= \tilde{\mathbf{Z}} - \frac{\langle \mathbf{V}_t, \tilde{\mathbf{Z}}_t \rangle}{1 - \|\mathbf{V}_t^\top \mathbf{V}_t\|_F^2} (\mathbf{I}_{4r} - \mathbf{V}\mathbf{V}^\top) \mathbf{G}\mathbf{V} \end{aligned} \quad (1)$$

where  $\mathbf{G} \doteq \mathbf{I}_r \otimes (\mathbf{e}_4 \mathbf{e}_4^\top)$ .

*Proof.* Since  $\Omega(r)$  is a Riemannian submanifold, the orthogonal projection of the Euclidean gradient gives its Riemannian gradient. Therefore, we want to find the matrix  $\Delta$  such that  $\text{Proj}_{\mathbf{V}}(\mathbf{Z}) = \mathbf{Z} + \Delta$  such that  $\|\Delta\|_F^2$  is minimal. If we denote the orthogonal complement of  $\mathbf{V}$  by  $\mathbf{V}_\perp \in \text{St}(4r-3, 4r)$ , then the  $4r \times 4r$  matrix  $[\mathbf{V} \ \mathbf{V}_\perp]$  is in  $O(4r)$ . Using this, we can write  $\Delta$  as  $\Delta = \mathbf{V}\mathbf{S} + \mathbf{V}\mathbf{K} + \mathbf{V}_\perp \mathbf{L}$  for some symmetric and skew-symmetric matrices  $\mathbf{S}, \mathbf{K}$  and some arbitrary matrix  $\mathbf{L}$ . One can show that  $\|\Delta\|_F^2 = \|\mathbf{S}\|_F^2 + \|\mathbf{K}\|_F^2 + \|\mathbf{L}\|_F^2$ .

First, we need  $\mathbf{V}^\top(\mathbf{Z} + \Delta)$  to be skew-symmetric, leading to  $\text{sym}(\mathbf{V}^\top \mathbf{Z} + \mathbf{S} + \mathbf{K}) = \mathbf{0}$ , due to  $\mathbf{V}^\top \mathbf{V}_\perp = \mathbf{0}$ . Also, we have  $\text{sym}(\mathbf{S}) = \mathbf{S}$  and  $\text{sym}(\mathbf{K}) = \mathbf{0}$ , yielding  $\mathbf{S} = -\text{sym}(\mathbf{V}^\top \mathbf{Z})$ . This gives us  $\tilde{\mathbf{Z}}$  once we substitute  $\mathbf{S}$  back in  $\Delta$ .

For the second constraint, we want  $\langle \mathbf{Z}_t + \Delta_t, \mathbf{V}_t \rangle$  to be zero, i.e.,  $\langle \mathbf{G}, \tilde{\mathbf{Z}}\mathbf{V}^\top + \mathbf{V}\mathbf{K}\mathbf{V}^\top + \mathbf{V}_\perp \mathbf{L}\mathbf{V}^\top \rangle = 0$ . Since  $\mathbf{G}$  is symmetric and  $\mathbf{V}\mathbf{K}\mathbf{V}^\top$  is skew-symmetric, their inner product is zero. After removing  $\mathbf{V}\mathbf{K}\mathbf{V}^\top$  from the constraint, forming the Lagrangian, and taking derivative with respect to  $\mathbf{L}$ , we get  $2\mathbf{L} + \lambda \mathbf{V}_\perp^\top \mathbf{G}\mathbf{V} = \mathbf{0}$ . Placing this expression for  $\mathbf{L}$  into the constraint and making use of the identity  $\mathbf{V}_\perp \mathbf{V}_\perp^\top = \mathbf{I}_{4r} - \mathbf{V}\mathbf{V}^\top$  and  $\mathbf{G}^2 = \mathbf{G}$ , we find  $\lambda$  to be

$$\lambda = \frac{2\langle \mathbf{G}, \mathbf{V}\tilde{\mathbf{Z}}^\top \rangle}{\langle \mathbf{G}, \mathbf{V}\mathbf{V}^\top \mathbf{G}\mathbf{V}_\perp \mathbf{V}_\perp^\top \rangle} = \frac{2\langle \mathbf{V}_t, \tilde{\mathbf{Z}}_t \rangle}{1 - \|\mathbf{V}_t^\top \mathbf{V}_t\|_F^2}$$

Substituting  $\mathbf{L} = -\frac{\lambda}{2} \mathbf{V}_\perp^\top \mathbf{G}\mathbf{V}$  back in  $\Delta$ , proof becomes complete.  $\square$

#### 1.2. Random Sampling on $\Omega(r)$

Here, we present the derivations of the formula for finding  $\mathbf{V}_E^\bullet$ , given by the last two terms of the following equations

$$\begin{aligned} \mathbf{V}_t^\bullet &= \tilde{\mathbf{V}}_t \|\tilde{\mathbf{V}}_t\|_F^{-1}, \\ \mathbf{K} &= (\mathbf{I}_3 - \mathbf{V}_t^\bullet{}^\top \mathbf{V}_t^\bullet)^{\frac{1}{2}}, \\ \mathbf{V}_E^\bullet &= \tilde{\mathbf{V}}_E \mathbf{K} (\mathbf{K} \tilde{\mathbf{V}}_E^\top \tilde{\mathbf{V}}_E \mathbf{K})^{\frac{1}{2}} \mathbf{K}. \end{aligned} \quad (2)$$

Since a matrix  $\mathbf{V}^\bullet \in \Omega(r) \subset \text{St}(3, 4r)$ , it must satisfy  $\mathbf{V}^\bullet{}^\top \mathbf{V}^\bullet = \mathbf{V}_t^\bullet{}^\top \mathbf{V}_t^\bullet + \mathbf{V}_E^\bullet{}^\top \mathbf{V}_E^\bullet = \mathbf{I}_3$ . Using the definition of  $\mathbf{K}$ , we need to find  $\mathbf{V}_E^\bullet$  that satisfies  $\mathbf{V}_E^\bullet{}^\top \mathbf{V}_E^\bullet = \mathbf{K}^2$ . We intend to find a matrix  $\mathbf{X}$  closest to  $\tilde{\mathbf{V}}_E$  that satisfies this condition, which leads to the following Lagrangian function

$$\mathcal{L}(\mathbf{X}, \Lambda) = \|\mathbf{X} - \tilde{\mathbf{V}}_E\|_F^2 + \langle \Lambda, \mathbf{X}^\top \mathbf{X} - \mathbf{K}^2 \rangle.$$

Taking the derivative with respect to  $\mathbf{X}$ , we get  $\mathbf{X} - \tilde{\mathbf{V}}_E + \mathbf{X}\Lambda = \mathbf{0}$  or  $\tilde{\mathbf{V}}_E = \mathbf{X}(\mathbf{I}_3 + \Lambda)$ . Multiplying both sides with their transpose and denoting the symmetric  $\mathbf{I}_3 + \Lambda$  by  $\mathbf{M}$ , we get  $\tilde{\mathbf{V}}_E^\top \tilde{\mathbf{V}}_E = \mathbf{M}\mathbf{K}^2\mathbf{M}$ . If we multiply both sides of this equality by  $\mathbf{K}$ , we get  $\mathbf{K}\tilde{\mathbf{V}}_E^\top \tilde{\mathbf{V}}_E \mathbf{K} = (\mathbf{K}\mathbf{M}\mathbf{K})^2$ . Solving for  $\mathbf{M}$  and using  $\mathbf{X} = \tilde{\mathbf{V}}_E \mathbf{M}^\dagger$ , we get the expression for  $\mathbf{V}_E^\bullet$  as given in (2).

#### 1.3. Gradient and Hessian

We can find the Riemannian gradient of  $h(\mathbf{V})$  by simply projecting the Euclidean gradient on the tangent space of  $\Omega(r)$

$$\begin{aligned} \text{grad } h(\mathbf{V}) &= \nabla h(\mathbf{V}) - \mathbf{V}\text{sym}(\mathbf{V}^\top \nabla h(\mathbf{V})) \\ &\quad - c(\mathbf{V}, \nabla h(\mathbf{V})) (\mathbf{I}_{4r} - \mathbf{V}\mathbf{V}^\top) \mathbf{G}\mathbf{V} \end{aligned} \quad (3)$$

where

$$c(\mathbf{V}, \mathbf{F}) \doteq \frac{\langle \mathbf{G}\mathbf{V}, \mathbf{F} - \mathbf{V}\text{sym}(\mathbf{V}^\top \mathbf{F}) \rangle}{1 - \|\mathbf{V}_t^\top \mathbf{V}_t\|_F^2}. \quad (4)$$

The projection of the derivative of the gradient vector field gives the Riemannian Hessian. This derivative is given by

$$\begin{aligned} D(\text{grad } h(\mathbf{V}))(\mathbf{V})[\dot{\mathbf{V}}] &= \nabla^2 h(\mathbf{V})[\dot{\mathbf{V}}] \\ &- \dot{\mathbf{V}}_{\text{sym}}(\mathbf{V}^\top \nabla h(\mathbf{V})) - \dot{c}(\cdot) \mathbf{G} \mathbf{V} \\ &- c(\cdot)(\mathbf{G} \dot{\mathbf{V}} - \dot{\mathbf{V}} \mathbf{V}^\top \mathbf{G} \mathbf{V}). \end{aligned} \quad (5)$$

In the derivations above, we omitted the terms of the form  $\mathbf{V} \mathbf{S}$  with a symmetric  $\mathbf{S}$  as these will be removed by the first step of the projection on the tangent space. Now as for the derivative of  $c(\cdot)$ , if we denote its nominator and denominator by  $n_c, d_c$ , we have

$$\dot{c}(\mathbf{V}, \nabla h(\mathbf{V})) = \frac{\dot{n}_c}{d_c} - \frac{n_c \dot{d}_c}{d_c^2} \quad (6)$$

and the derivatives of the nominator and denominator are given by

$$\begin{aligned} \dot{n}_c &= \left( \langle \mathbf{G} \dot{\mathbf{V}}, \nabla h(\mathbf{V}) - \mathbf{V}_{\text{sym}}(\mathbf{V}^\top \nabla h(\mathbf{V})) \rangle \right. \\ &+ \langle \mathbf{G} \mathbf{V}, \nabla^2 h(\mathbf{V})[\dot{\mathbf{V}}] - \dot{\mathbf{V}}_{\text{sym}}(\mathbf{V}^\top \nabla h(\mathbf{V})) \\ &\left. - \mathbf{V}_{\text{sym}}(\dot{\mathbf{V}}^\top \nabla h(\mathbf{V}) + \mathbf{V}^\top \nabla^2 h(\mathbf{V})[\dot{\mathbf{V}}]) \rangle \right) \\ \dot{d}_c &= -2 \langle \dot{\mathbf{V}}_t^\top \mathbf{V}_t + \mathbf{V}_t^\top \dot{\mathbf{V}}_t, \mathbf{V}_t^\top \mathbf{V}_t \rangle \\ &= -4 \langle \dot{\mathbf{V}}_t^\top \mathbf{V}_t, \mathbf{V}_t^\top \mathbf{V}_t \rangle \end{aligned} \quad (7)$$

Given these, one can find the Hessian using the projection of  $D(\text{grad } h(\mathbf{V}))$  on the tangent space at  $\mathbf{V}$ .

#### 1.4. Certificate Matrix

Given a first-order optimal point  $\mathbf{V}^* = \ell(\mathbf{Y}^*)$  of the rank-restricted problem, it satisfies  $\text{grad } h(\mathbf{V}^*) = \mathbf{0}$  or  $\text{grad } g(\mathbf{Y}^*) = \mathbf{0}$ . Using the mapping between the two variable arrangements, we can find  $\text{grad } g(\mathbf{Y})$  using the projection given in (1) and the expression given in (3)

$$\text{grad } g(\mathbf{Y}) = \ell^{-1}(\text{Proj}_{\ell(\mathbf{Y})}(\ell(2\mathbf{C}\mathbf{Y}))) = \text{Proj}_{\mathbf{Y}}(2\mathbf{C}\mathbf{Y}). \quad (8)$$

The projection for the  $\mathbf{Y}$  arrangement is thus given by

$$\begin{aligned} \tilde{\mathbf{Z}} &= \mathbf{Z} - (\mathbf{M} \otimes \mathbf{I}_4) \mathbf{Y} \\ \text{Proj}_{\mathbf{Y}}(\mathbf{Z}) &= \tilde{\mathbf{Z}} - (\mathbf{I}_3 \otimes (\mathbf{e}_4 \mathbf{e}_4^\top) - \mathbf{N} \otimes \mathbf{I}_4) c(\tilde{\mathbf{Z}}) \mathbf{Y} \end{aligned} \quad (9)$$

where  $\mathbf{M}, \mathbf{N} \in \mathbb{R}^{3 \times 3}$  are such that  $m_{ij} = \frac{1}{2}(\langle \mathbf{Y}_i, \mathbf{Z}_j \rangle + \langle \mathbf{Y}_j, \mathbf{Z}_i \rangle)$  and  $n_{ij} = \langle \mathbf{e}_4 \mathbf{e}_4^\top, \mathbf{Y}_i^\top \mathbf{Y}_j \rangle$ , and the function  $c(\cdot)$  is given by (4). Once we project  $2\mathbf{C}\mathbf{Y}$  onto the tangent space, we get the Riemannian gradient. Given the structure of  $\mathbf{C}$ , for  $\mathbf{Z} = 2\mathbf{C}\mathbf{Y}$  we have  $c(\tilde{\mathbf{Z}}) = 0$  due to  $\mathbf{Z}_t, \tilde{\mathbf{Z}}_t$  being equal to zero. Therefore, the projection of the gradient is obtained by the first step of the projection process, yielding

$$\text{grad } g(\mathbf{Y}^*) = \mathbf{0} \rightarrow (\mathbf{C} - (\mathbf{M} \otimes \mathbf{I}_4)) \mathbf{Y}^* = \mathbf{0}. \quad (10)$$

This gives us  $\mathbf{S} \doteq \mathbf{C} - (\mathbf{M} \otimes \mathbf{I}_4)$  satisfying  $\mathbf{S} \mathbf{Y}^* = \mathbf{0}$ .

## 2. Local Solver

### 2.1. Projection on Tangent Space

**Lemma 2.** *Projection on the tangent space of  $\text{QO}^2$  is given by:*

$$\begin{aligned} \tilde{\mathbf{Z}}_i &= \mathbf{Z}_i - \mathbf{O}_i \text{sym}(\mathbf{O}_i^\top \mathbf{Z}_i) \\ \text{Proj}_{\mathbf{O}_i}(\mathbf{Z}_i) &= \tilde{\mathbf{Z}}_i - \frac{\sum \langle \mathbf{O}_i^\top \tilde{\mathbf{Z}}_j, \mathbf{F} \rangle}{2} \mathbf{O}_i \text{skew}(\mathbf{O}_i^\top \mathbf{O}_j \mathbf{F}) \end{aligned} \quad (11)$$

*Proof.* Similar to the proof of Lemma 1, we want to find the matrices  $\Delta_i$  such that  $\text{Proj}_{\mathbf{O}_i}(\mathbf{Z}_i) = \mathbf{Z}_i + \Delta_i$  so that  $\|\Delta_1\|_{\mathbb{F}}^2 + \|\Delta_2\|_{\mathbb{F}}^2$  is minimal. Since  $\mathbf{O}_i$  is a basis, we can write  $\Delta_i$  as  $\Delta_i = \mathbf{O}_i(\mathbf{S}_i + \mathbf{K}_i)$  for some symmetric and skew-symmetric matrices  $\mathbf{S}_i, \mathbf{K}_i$ . As  $\text{Proj}_{\mathbf{O}_i}(\mathbf{Z}_i)^\top \mathbf{O}_i$  should be skew-symmetric, the symmetric part is given by  $\mathbf{S}_i = -\text{sym}(\mathbf{O}_i^\top \mathbf{Z}_i)$ . This leaves us  $\text{Proj}_{\mathbf{O}_i}(\mathbf{Z}_i) = \tilde{\mathbf{Z}}_i + \mathbf{O}_i \mathbf{K}_i$ , and we want  $\mathbf{K}_1, \mathbf{K}_2$  to satisfy

$$\sum_{i \neq j} \langle \mathbf{F}, \mathbf{O}_i^\top \tilde{\mathbf{Z}}_j + \mathbf{O}_i^\top \mathbf{O}_j \mathbf{K}_j \rangle = 0. \quad (12)$$

Since this is the sum of two inner products between the last columns of  $\mathbf{O}_i, \tilde{\mathbf{Z}}_j + \mathbf{O}_j \mathbf{K}_j$ , the matrices  $\mathbf{K}_1, \mathbf{K}_2$  need only have non-zero entries in their fourth rows and columns. Noting that the right bottom entry of  $\mathbf{K}_1, \mathbf{K}_2$  is zero, we denote their fourth column minus the last (zero) entry as  $\mathbf{k}_1, \mathbf{k}_2 \in \mathbb{R}^3$ . If we denote the epipole appearing in the bottom row of  $\mathbf{Q} = \mathbf{O}_1^\top \mathbf{O}_2$  by  $\mathbf{t}_l$  and the other epipole by  $\mathbf{t}_r$ , we can rewrite (12) as  $\mathbf{t}_l^\top \mathbf{k}_2 + \mathbf{t}_r^\top \mathbf{k}_1 = -\sum_{i \neq j} \langle \mathbf{F}, \mathbf{O}_i^\top \tilde{\mathbf{Z}}_j \rangle$ . Due to  $\|\mathbf{K}_i\|_{\mathbb{F}}^2 = 2\|\mathbf{k}_i\|^2$ , we can use the Lagrangian function  $\|\mathbf{k}_1\|^2 + \|\mathbf{k}_2\|^2 + \lambda(\mathbf{t}_l^\top \mathbf{k}_2 + \mathbf{t}_r^\top \mathbf{k}_1 + \sum_{i \neq j} \langle \mathbf{F}, \mathbf{O}_i^\top \tilde{\mathbf{Z}}_j \rangle)$  and find the optimal  $\mathbf{k}_1, \mathbf{k}_2$ , which concludes the proof.  $\square$

### 2.2. Gradient and Hessian

For the algebraic error, we have  $f(\mathbf{Q})$  as

$$f(\mathbf{Q}) = \sum_{k=1}^N \langle \mathbf{Q}, \check{\mathbf{f}}_{i,k} \check{\mathbf{f}}_{j,k}^\top \rangle^2, \quad (13)$$

and its gradient and hessian are given as

$$\begin{aligned} \nabla_{\mathbf{Q}} f(\mathbf{Q}) &= 2 \sum_{k=1}^N \langle \mathbf{Q}, \check{\mathbf{f}}_{i,k} \check{\mathbf{f}}_{j,k}^\top \rangle \check{\mathbf{f}}_{i,k} \check{\mathbf{f}}_{j,k}^\top, \\ \nabla_{\mathbf{Q}}^2 f(\mathbf{Q})[\dot{\mathbf{Q}}] &= 2 \sum_{k=1}^N \langle \dot{\mathbf{Q}}, \check{\mathbf{f}}_{i,k} \check{\mathbf{f}}_{j,k}^\top \rangle \check{\mathbf{f}}_{i,k} \check{\mathbf{f}}_{j,k}^\top, \end{aligned} \quad (14)$$

where  $\check{\mathbf{f}}_{i,k} = [\mathbf{f}_{i,k}^\top 0]^\top$  and  $\check{\mathbf{f}}_{j,k} = [\mathbf{f}_{j,k}^\top 0]^\top$ .

Taking gradient of  $f(\mathbf{Q}) = f(\mathbf{O}_1^\top \mathbf{O}_2)$  with respect to  $\mathbf{O}_1$  and  $\mathbf{O}_2$  gives

$$\begin{aligned} \nabla_{\mathbf{O}_1} f(\mathbf{Q}) &= 2 \mathbf{O}_2 \nabla_{\mathbf{Q}} f(\mathbf{Q})^\top, \\ \nabla_{\mathbf{O}_2} f(\mathbf{Q}) &= 2 \mathbf{O}_1 \nabla_{\mathbf{Q}} f(\mathbf{Q}), \end{aligned} \quad (15)$$

and their Hessian is given by

$$\begin{aligned}\nabla_{\mathbf{O}_1}^2 f(\mathbf{Q})[\dot{\mathbf{O}}_1] &= 2\mathbf{O}_2 \nabla_{\mathbf{Q}}^2 f(\mathbf{Q})[\dot{\mathbf{O}}_1^T \mathbf{O}_2]^T, \\ \nabla_{\mathbf{O}_2}^2 f(\mathbf{Q})[\dot{\mathbf{O}}_2] &= 2\mathbf{O}_1 \nabla_{\mathbf{Q}}^2 f(\mathbf{Q})[\mathbf{O}_1^T \dot{\mathbf{O}}_2].\end{aligned}\quad (16)$$

As before, the Riemannian Hessian is given by projecting the differential of the gradient. The gradient and its differential are given as

$$\begin{aligned}\text{grad}_{\mathbf{O}_i} f(\mathbf{Q}) &= \nabla_{\mathbf{O}_i} f(\mathbf{Q}) - \mathbf{O}_i \text{sym}(\mathbf{O}_i^T \nabla_{\mathbf{O}_i} f(\mathbf{Q})) \\ &\quad - c_i(\cdot) \mathbf{O}_i \text{skew}(\mathbf{O}_i^T \mathbf{O}_j \mathbf{F}), \\ D(\text{grad}_{\mathbf{O}_i} f(\mathbf{Q})) &= \nabla_{\mathbf{O}_i}^2 f(\mathbf{Q})[\dot{\mathbf{O}}_i] \\ &\quad - \dot{\mathbf{O}}_i \text{sym}(\mathbf{O}_i^T \nabla_{\mathbf{O}_i} f(\mathbf{Q})) \\ &\quad - \dot{c}_i(\cdot) \mathbf{O}_i \text{skew}(\mathbf{O}_i^T \mathbf{O}_j \mathbf{F}) \\ &\quad - c_i(\cdot) \dot{\mathbf{O}}_i \text{skew}(\mathbf{O}_i^T \mathbf{O}_j \mathbf{F}) \\ &\quad - c_i(\cdot) \mathbf{O}_i \text{skew}(\dot{\mathbf{O}}_i^T \mathbf{O}_j \mathbf{F}),\end{aligned}\quad (17)$$

where the function  $c_i(\cdot)$  and its differential are given by

$$\begin{aligned}c_i(\mathbf{O}_{1,2}, \nabla_{\mathbf{O}_{1,2}} f(\mathbf{Q})) &= \\ \frac{1}{2} \sum_{i \neq j} \langle \mathbf{O}_i^T (\nabla_{\mathbf{O}_j} f(\mathbf{Q}) - \mathbf{O}_j \text{sym}(\mathbf{O}_j^T \nabla_{\mathbf{O}_j} f(\mathbf{Q}))), \mathbf{F} \rangle, \\ \dot{c}_i(\mathbf{O}_{1,2}, \nabla_{\mathbf{O}_{1,2}} f(\mathbf{Q})) &= \\ \frac{1}{2} \langle \dot{\mathbf{O}}_i^T (\nabla_{\mathbf{O}_j} f(\mathbf{Q}) - \mathbf{O}_j \text{sym}(\mathbf{O}_j^T \nabla_{\mathbf{O}_j} f(\mathbf{Q}))), \mathbf{F} \rangle \\ + \frac{1}{2} \langle \mathbf{O}_j^T (\nabla_{\mathbf{O}_i}^2 f(\mathbf{Q})[\dot{\mathbf{O}}_i] - \dot{\mathbf{O}}_i \text{sym}(\mathbf{O}_i^T \nabla_{\mathbf{O}_i} f(\mathbf{Q})) \\ - \mathbf{O}_i \text{sym}(\dot{\mathbf{O}}_i^T \nabla_{\mathbf{O}_i} f(\mathbf{Q}) + \mathbf{O}_i^T \nabla_{\mathbf{O}_i}^2 f(\mathbf{Q})[\dot{\mathbf{O}}_i])), \mathbf{F} \rangle.\end{aligned}\quad (18)$$
